# Supplementary material
Source: PubMed Central journal article supplement (PMC2572952)
Supplement: 0803654105_0803654105SI.pdf [file 0803654105_0803654105SI.pdf]

# Supporting Information

Brochet *et al.* 10.1073/pnas.0803654105

Table S1. Transfer frequency of the 30 *Erm<sup>R</sup>* insertions

| Insertion | Coordinates of the <i>Erm<sup>R</sup></i> Insertion on the NEM316 Chromosome (bp) | Transfer Frequency ( $\times 10^{-8}$ ) | Standard Deviation |
|-----------|-----------------------------------------------------------------------------------|-----------------------------------------|--------------------|
| I-1       | 144,753                                                                           | ND*                                     | —                  |
| I-2       | 297,448                                                                           | 0.11                                    | 0.10               |
| I-3       | 332,423                                                                           | ND                                      | —                  |
| I-4       | 376,913                                                                           | ND                                      | —                  |
| I-5       | 656,967                                                                           | 0.17                                    | 0.09               |
| I-6       | 658,284                                                                           | 0.69                                    | 0.23               |
| I-7       | 761,268                                                                           | 2.35                                    | 0.56               |
| I-8       | 818,056                                                                           | 1.25                                    | 0.16               |
| I-9       | 821,759                                                                           | 1.03                                    | 0.23               |
| I-10      | 846,720                                                                           | 0.09                                    | 0.09               |
| I-11      | 967,298                                                                           | 0.06                                    | 0.06               |
| I-12      | 986,348                                                                           | 0.87                                    | 0.11               |
| I-13      | 1,064,640                                                                         | 1.71                                    | 0.18               |
| I-14      | 1,073,073                                                                         | 0.06                                    | 0.04               |
| I-15      | 1,080,795                                                                         | 0.12                                    | 0.08               |
| I-16      | 1,124,410                                                                         | 0.06                                    | 0.01               |
| I-17      | 1,159,993                                                                         | 0.05                                    | 0.03               |
| I-18      | 1,213,207                                                                         | 2.33                                    | 0.25               |
| I-19      | 1,272,413                                                                         | 1.28                                    | 0.31               |
| I-20      | 1,304,385                                                                         | 0.06                                    | 0.04               |
| I-21      | 1,355,312                                                                         | ND                                      | —                  |
| I-22      | 1,458,647                                                                         | ND                                      | —                  |
| I-23      | 1,527,989                                                                         | 0.03                                    | 0.03               |
| I-24      | 1,619,215                                                                         | 0.04                                    | 0.03               |
| I-25      | 1,665,129                                                                         | ND                                      | —                  |
| I-26      | 1,784,976                                                                         | ND                                      | —                  |
| I-27      | 1,836,262                                                                         | ND                                      | —                  |
| I-28      | 1,928,182                                                                         | 0.01                                    | 0.02               |
| I-29      | 1,942,706                                                                         | ND                                      | —                  |
| I-30      | 2,105,767                                                                         | ND                                      | —                  |

\*No transconjugant detected ( $<10^{-11}$ )

Table S2. Conserved regions among the eight *S. agalactiae* chromosomes

| Reference | Region of Low Polymorphism Shared by the Indicated Genome                                                                                                                                                                                                                                                                                                                                                                                                                                                                                                                                                                                                                                                                                                                                                                                                                                                                                                                                                                                                                                                                                                                                                                                                                                                                                                                                                                                                                                                                                                             |
|-----------|-----------------------------------------------------------------------------------------------------------------------------------------------------------------------------------------------------------------------------------------------------------------------------------------------------------------------------------------------------------------------------------------------------------------------------------------------------------------------------------------------------------------------------------------------------------------------------------------------------------------------------------------------------------------------------------------------------------------------------------------------------------------------------------------------------------------------------------------------------------------------------------------------------------------------------------------------------------------------------------------------------------------------------------------------------------------------------------------------------------------------------------------------------------------------------------------------------------------------------------------------------------------------------------------------------------------------------------------------------------------------------------------------------------------------------------------------------------------------------------------------------------------------------------------------------------------------|
| 2603 V/R  | <p>18RS21<br/> Region 1: 1348.5–1065.5<br/> Region 2: 1232.5–1241<br/> CJB111<br/> Region 1: 44–173.5<br/> Region 2: 180–433<br/> Region 3: 480–494.5<br/> Region 4: 499.5–674.5<br/> Region 5: 717–1029<br/> Region 6: 1232.5–1241<br/> Region 7: 1348.5–1369<br/> Region 8: 1608.5–1688<br/> A909<br/> Region 1: 154.5–173.5<br/> Region 2: 180–411<br/> Region 3: 476–674.5<br/> Region 4: 698.5–1019<br/> Region 5: 1348.5–1369<br/> Region 6: 1494–1728.5<br/> H36B<br/> Region 1: 154.5–173.5<br/> Region 2: 180–411<br/> Region 3: 459–674.5<br/> Region 4: 698.5–1019<br/> Region 5: 1348.5–1369<br/> Region 6: 1422.5–1435<br/> Region 7: 1483–1487.5<br/> Region 8: 1640–1728.5<br/> NEM316<br/> Region 1: 1798.5–16.5<br/> Region 2: 44–53<br/> Region 3: 297–328.5<br/> Region 4: 336.5–411<br/> Region 5: 512–674.5<br/> Region 6: 717–795<br/> Region 7: 987.5–1065.5<br/> Region 8: 1228–1241<br/> Region 9: 1348.5–1369<br/> Region 10: 1422–1495<br/> Region 11: 1507.5–1522<br/> Region 12: 1541–1572.5<br/> Region 13: 1678–1688<br/> 515<br/> Region 1: 1798.5–44<br/> Region 2: 512–529.5<br/> Region 3: 534.5–547.5<br/> Region 5: 599.5–674.5<br/> Region 6: 987.5–1052.5<br/> Region 7: 1288–1241<br/> Region 8: 1348.5–1384.5<br/> Region 9: 1422–1495<br/> Region 10: 1507.5–1522<br/> Region 11: 1547–1572.5<br/> Region 12: 1678.5–1688<br/> COH1<br/> Region 1: 433–438.5<br/> Region 2: 445–455.5<br/> Region 3: 599.5–700.5<br/> Region 4: 947–1019<br/> Region 5: 1232.5–1335<br/> Region 6: 1348.5–1369<br/> Region 7: 1424–1448</p> |

| Reference | Region of Low Polymorphism Shared by the Indicated Genome                                                                                                                                                                                                                                                                                                                                                                                                                                                                                                                                                                                                                                                                                                                                                                                                                                                                                                                                                                                                                                                                                                                                                                                                                                                                                                                                                                                                                                                                                                                                                                                                                                                                                                                                                                                                                                                                                                                                                                                                                                                                                                                                                                                        |
|-----------|--------------------------------------------------------------------------------------------------------------------------------------------------------------------------------------------------------------------------------------------------------------------------------------------------------------------------------------------------------------------------------------------------------------------------------------------------------------------------------------------------------------------------------------------------------------------------------------------------------------------------------------------------------------------------------------------------------------------------------------------------------------------------------------------------------------------------------------------------------------------------------------------------------------------------------------------------------------------------------------------------------------------------------------------------------------------------------------------------------------------------------------------------------------------------------------------------------------------------------------------------------------------------------------------------------------------------------------------------------------------------------------------------------------------------------------------------------------------------------------------------------------------------------------------------------------------------------------------------------------------------------------------------------------------------------------------------------------------------------------------------------------------------------------------------------------------------------------------------------------------------------------------------------------------------------------------------------------------------------------------------------------------------------------------------------------------------------------------------------------------------------------------------------------------------------------------------------------------------------------------------|
| 18RS21    | <p>Region 8: 1499.5–1679.5<br/>           Region 9: 1702.5–1798.5<br/>           Region 10: 2100–2114<br/>           Region 11: 2119–2128.5</p> <p>CJB111<br/>           Region 1: 44–173.5<br/>           Region 2: 180–433<br/>           Region 3: 480.5–494.5<br/>           Region 4: 499.5–674.5<br/>           Region 5: 717–1029<br/>           Region 6: 1066–1081<br/>           Region 7: 1103.5–1124<br/>           Region 8: 1232.5–1241<br/>           Region 9: 1348.5–1369<br/>           Region 10: 1608.5–1688</p> <p>A909<br/>           Region 1: 154.5–173.5<br/>           Region 2: 180–411<br/>           Region 3: 476–674.5<br/>           Region 4: 698.5–1019<br/>           Region 5: 1124–1132.5<br/>           Region 6: 1157–1167.5<br/>           Region 7: 1342–1369<br/>           Region 8: 1494–1728.5</p> <p>H36B<br/>           Region 1: 154.5–173.5<br/>           Region 2: 180–411<br/>           Region 3: 459–674.5<br/>           Region 4: 698.5–1019<br/>           Region 5: 1103.5–1132.5<br/>           Region 6: 1342–1369<br/>           Region 7: 1422–1435<br/>           Region 8: 1483–1487.5<br/>           Region 9: 1640–1728.5</p> <p>NEM316<br/>           Region 1: 1798.5–16.5<br/>           Region 2: 44–53<br/>           Region 3: 297–328.5<br/>           Region 4: 336.5–411<br/>           Region 5: 512–674.5<br/>           Region 6: 717–795<br/>           Region 7: 987.5–1081<br/>           Region 8: 1103.5–1167.5<br/>           Region 9: 1232.5–1241<br/>           Region 10: 1348.5–1369<br/>           Region 11: 1422–1495<br/>           Region 12: 1507.5–1522<br/>           Region 13: 1541–1572.5<br/>           Region 14: 1678–1688</p> <p>515<br/>           Region 1: 1798.5–44<br/>           Region 2: 512–529.5<br/>           Region 3: 534.5–547.5<br/>           Region 4: 599.5–674.5<br/>           Region 5: 987.5–1052.5<br/>           Region 6: 1069.5–1081<br/>           Region 7: 1124–1132.5<br/>           Region 8: 1157–1167.5<br/>           Region 9: 1232.5–1241<br/>           Region 10: 1342–1384.5<br/>           Region 11: 1422–1495<br/>           Region 12: 1507.5–1522<br/>           Region 13: 1547–1572.5</p> |

| Reference | Region of Low Polymorphism Shared by the Indicated Genome                                                                                                                                                                                                                                                      |
|-----------|----------------------------------------------------------------------------------------------------------------------------------------------------------------------------------------------------------------------------------------------------------------------------------------------------------------|
| CJB111    | Region 14: 1678–1688<br>COH1<br>Region 1: 433–438.5<br>Region 2: 445–455.5<br>Region 3: 599.5–700.5<br>Region 4: 946.5–1019<br>Region 5: 1103.5–1145.5<br>Region 6: 1232.5–1369<br>Region 7: 1424–1448<br>Region 8: 1499.5–1679.5<br>Region 9: 1702.5–1798.5<br>Region 10: 2100–2114<br>Region 11: 2119–2128.5 |
|           | A909<br>Region 1: 154.5–411<br>Region 2: 480–494.5<br>Region 3: 499.5–700.5<br>Region 4: 717–1019<br>Region 5: 1319.5–1335<br>Region 6: 1348.5–1495<br>Region 7: 1608.5–1688<br>Region 8: 1728.5–1878.5<br>Region 9: 2019–2115.5<br>H36B                                                                       |
|           | Region 1: 154.5–411<br>Region 2: 480–494.5<br>Region 3: 499.5–700.5<br>Region 4: 717–1019<br>Region 5: 1103.5–1124<br>Region 6: 1319.5–1335<br>Region 7: 1348.5–1369<br>Region 8: 1487.5–1608.5<br>Region 9: 1640–1688<br>Region 10: 1728.5–1878.5<br>Region 11: 2019–2115.5                                   |
|           | NEM316<br>Region 1: 44–53<br>Region 2: 297–328.5<br>Region 3: 336.5–411<br>Region 4: 512–795<br>Region 5: 987.5–1029<br>Region 6: 1065.5–1124<br>Region 7: 1232.5–1243.5<br>Region 8: 1319.5–1369<br>Region 9: 1678–1688<br>515                                                                                |
|           | Region 1: 512–529.5<br>Region 2: 534.5–547.5<br>Region 3: 599.5–700.5<br>Region 4: 987.5–1029<br>Region 5: 1069.5–1081<br>Region 6: 1232.5–1243.5<br>Region 7: 1319.5–1335<br>Region 8: 1348.5–1369<br>Region 9: 1541–1547<br>Region 10: 1678–1688<br>COH1                                                     |
|           | Region 1: 0–9<br>Region 2: 599.5–674.5<br>Region 3: 946.5–1019<br>Region 4: 1103.5–1124<br>Region 5: 1233–1241<br>Region 6: 1348.5–1369                                                                                                                                                                        |

| Reference | Region of Low Polymorphism Shared by the Indicated Genome                                                                                                                                                                                                                                                                                                                                                                                                                                                                                                                                                                                                                                                                                                                                                                                                                                                                                                                                 |
|-----------|-------------------------------------------------------------------------------------------------------------------------------------------------------------------------------------------------------------------------------------------------------------------------------------------------------------------------------------------------------------------------------------------------------------------------------------------------------------------------------------------------------------------------------------------------------------------------------------------------------------------------------------------------------------------------------------------------------------------------------------------------------------------------------------------------------------------------------------------------------------------------------------------------------------------------------------------------------------------------------------------|
| A909      | <p>Region 7: 1608.5–1679.5</p> <p>H36B<br/> Region 1: 1640–459<br/> Region 2: 476–1103.5<br/> Region 3: 1124–1132.5<br/> Region 4: 1184.5–1369<br/> Region 5: 1487.5–1495</p> <p>NEM316<br/> Region 1: 297–328.5<br/> Region 2: 336.5–411<br/> Region 3: 512–700.5<br/> Region 4: 717–795<br/> Region 5: 987.5–1019<br/> Region 6: 1124–1132.5<br/> Region 7: 1157–1167.5<br/> Region 8: 1311.5–1335<br/> Region 9: 1348.5–1369<br/> Region 10: 1507.5–1522<br/> Region 11: 1541–1572.5<br/> Region 12: 1678–1688</p> <p>515<br/> Region 1: 512–529.5<br/> Region 2: 534.5–547.5<br/> Region 3: 599.5–700.5<br/> Region 4: 987.5–1019<br/> Region 5: 1124–1132.5<br/> Region 6: 1157–1167.5<br/> Region 7: 1311.5–1369<br/> Region 8: 1507.5–1522<br/> Region 9: 1547–1572.5<br/> Region 10: 1678–1688</p> <p>COH1<br/> Region 1: 599.5–674.5<br/> Region 2: 946.5–1019<br/> Region 3: 1124–1132.5<br/> Region 4: 1342–1369<br/> Region 5: 1499.5–1679.5<br/> Region 6: 1702.5–1728.5</p> |
| H36B      | <p>NEM316<br/> Region 1: 297–328.5<br/> Region 2: 336.5–411<br/> Region 3: 512–700.5<br/> Region 4: 717–795<br/> Region 5: 987.5–1019<br/> Region 6: 1103.5–1132.5<br/> Region 7: 1311.5–1335<br/> Region 8: 1348.5–1369<br/> Region 9: 1422–1435<br/> Region 10: 1483–1487.5<br/> Region 11: 1678–1688</p> <p>515<br/> Region 1: 512–529.5<br/> Region 2: 534.5–547.5<br/> Region 3: 599.5–700.5<br/> Region 4: 987.5–1019<br/> Region 5: 1124–1132.5<br/> Region 6: 1311.5–1369<br/> Region 7: 1422–1435<br/> Region 8: 1483–1487.5<br/> Region 9: 1541–1547<br/> Region 10: 1678–1688</p> <p>COH1</p>                                                                                                                                                                                                                                                                                                                                                                                  |

| Reference | Region of Low Polymorphism Shared by the Indicated Genome                                                                                                                                                                                                                                                                                                                                                                                                                                                                                                                                                                                                                                                                                                                                                                                                                                                                                 |
|-----------|-------------------------------------------------------------------------------------------------------------------------------------------------------------------------------------------------------------------------------------------------------------------------------------------------------------------------------------------------------------------------------------------------------------------------------------------------------------------------------------------------------------------------------------------------------------------------------------------------------------------------------------------------------------------------------------------------------------------------------------------------------------------------------------------------------------------------------------------------------------------------------------------------------------------------------------------|
| NEM316    | Region 1: 599.5–674.5<br>Region 2: 946.5–1019<br>Region 3: 1103.5–1132.5<br>Region 4: 1342–1369<br>Region 5: 1424–1435<br>Region 6: 1640–1679.5<br>Region 7: 1702.5–1728.5                                                                                                                                                                                                                                                                                                                                                                                                                                                                                                                                                                                                                                                                                                                                                                |
| 515       | 515<br>Region 1: 1547–16.5<br>Region 2: 218.5–228<br>Region 3: 443–447<br>Region 4: 470.5–529.5<br>Region 5: 534.5–547.5<br>Region 6: 599.5–700.5<br>Region 7: 795–1052.5<br>Region 8: 1069.5–1081<br>Region 9: 1124–1132.5<br>Region 10: 1157–1167.5<br>Region 11: 1228–1335<br>Region 12: 1348.5–1369<br>Region 13: 1422–1541<br>COH1<br>Region 1: 470.5–503<br>Region 2: 599.5–674.5<br>Region 3: 987.5–1019<br>Region 4: 1103.5–1132.5<br>Region 5: 1232.5–1241<br>Region 6: 1348.5–1369<br>Region 7: 1424–1448<br>Region 8: 1507.5–1522<br>Region 9: 1541–1572.5<br>Region 10: 2100–2114<br>Region 11: 2119–2128.5<br><br>COH1<br>Region 1: 392.5–407.5<br>Region 2: 470.5–503<br>Region 3: 599.5–674.5<br>Region 4: 987.5–1019<br>Region 5: 1124–1132.5<br>Region 6: 1232.5–1241<br>Region 7: 1342–1369<br>Region 8: 1424–1448<br>Region 9: 1507.5–1522<br>Region 10: 1547–1572.5<br>Region 11: 2100–2114<br>Region 12: 2119–2128.5 |

The chromosomal coordinates relative to strain 2603 V/R in kb are indicated. Previously described genomic islands (absent in at least one strain) and ribosomal RNA operons (conserved in all strains) are not taken into account.

Table S3. Bacterial strains and plasmids

| Strains and Plasmids            | Relevant Genotype and Resistance Profile* or Characteristics                      |
|---------------------------------|-----------------------------------------------------------------------------------|
| <b>Strains</b>                  |                                                                                   |
| NEM316                          | ST23; III; Isolated from neonate <sup>†</sup>                                     |
| A909RF                          | ST7; Ia; Isolated from neonate <sup>‡</sup> , spontaneous mutant for Rif and Fus  |
| A909RF <i>recA</i> <sup>-</sup> | <i>recA</i> <sup>-</sup> ; Tet                                                    |
| BM110                           | ST17; III; Tet; Isolated from neonate <sup>§</sup>                                |
| BM132                           | ST19; III; Rif, Fus <sup>  </sup>                                                 |
| 304-36                          | ST67; NT <sup>b</sup> ; Bovine mastitis; France                                   |
| 411-07                          | ST61; NT; Bovine mastitis; France <sup>  </sup>                                   |
| 553-08                          | ST2; NT; Goat mastitis; France                                                    |
| CCH268                          | ST10; III; Carriage, adult; France <sup>  </sup>                                  |
| Dak30                           | ST26; V; Carriage, adult; Senegal                                                 |
| Ban43                           | ST328; V; Carriage, adult; Central African Republic                               |
| 2.22                            | ST246; Ib; Fish; Israël <sup>**</sup> , <sup>††</sup>                             |
| 043-14                          | ST340; NT; Bovine mastitis; Great Britain                                         |
| SS1218                          | ST260; Ib; Bigmouth Buffalo; USA                                                  |
| NEM1575                         | ST17; III; Neonate; France <sup>  </sup>                                          |
| Mad74                           | ST2; Ia; Carriage, adult; Spain                                                   |
| Ban29                           | ST188; III; Carriage adult; Central African Republic                              |
| CCH263                          | ST23; Ia; Urine, adult; France <sup>  </sup>                                      |
| CCH350                          | ST23; NT; Blood, adult; France <sup>  </sup>                                      |
| <b>Plasmids</b>                 |                                                                                   |
| pGhost8                         | Tet; Thermosensitive derivative of pGK12 <sup>‡‡</sup>                            |
| pCAM45                          | Em, Km; ColE1 replicon, thermosensitive derivative of pGK12, Himar1 <sup>§§</sup> |

\*Abbreviations: Em, resistance to erythromycin; Fus, resistance to fusidic acid; Km, resistance to kanamycin; NT, non-typeable; Rif, resistance to rifampicin; Tet, resistance to tetracycline.

<sup>†</sup>Glaser P, *et al.* (2002) Genome sequence of *Streptococcus agalactiae*, a pathogen causing invasive neonatal disease. *Mol Microbiol.* 45:1499–1513.

<sup>‡</sup>Tettelin H, *et al.* (2005) Genome analysis of multiple pathogenic isolates of *Streptococcus agalactiae*: Implications for the microbial "pan-genome". *Proc Natl Acad Sci U S A* 102:13950–13955.

<sup>§</sup>Stalhammar-Carlemalm M, Stenberg L, Lindahl G. (1993) Protein rib: A novel group B streptococcal cell surface protein that confers protective immunity and is expressed by most strains causing invasive infections. *J Exp Med* 177:1593–1603.

<sup>||</sup>Horodniceanu T, Bougueleret L, El-Solh N, Bouanchaud DH, Chabbert YA. (1979) Conjugative R plasmids in *Streptococcus agalactiae* (group B). *Plasmid* 2:197–206.

<sup>||</sup>Brochet M, *et al.* (2006) Genomic diversity and evolution within the species *Streptococcus agalactiae*. *Microbes Infect* 8:1227–1243.

<sup>\*\*</sup>Eldar A, *et al.* (1997) Restriction fragment length polymorphisms of 16S rDNA and of whole rRNA genes (ribotyping) of *Streptococcus iniae* strains from the United States and Israel. *FEMS Microbiol Lett* 151:155–62.

<sup>††</sup>Vandamme P, Devriese LA, Pot B, Kersters K, Melin P. (1997) *Streptococcus difficile* is a nonhemolytic group B, type Ib *Streptococcus*. *Int J Syst Bacteriol* 47:81–85.

<sup>‡‡</sup>Biswas I, Gruss A, Ehrlich SD, Maguin E. (1993) High-efficiency gene inactivation and replacement system for gram-positive bacteria. *J Bacteriol* 175:3628–3635.

<sup>§§</sup>May JP, Walker CA, Maskell DJ, Slater JD. (2004) Development of an *in vivo* Himar1 transposon mutagenesis system for use in *Streptococcus equi* subsp. *equi*. *FEMS Microbiol Lett* 238:401–409.

**Table S4. Oligonucleotide primers**

| Name                                                   | Forward Probe           | Reverse Probe            |
|--------------------------------------------------------|-------------------------|--------------------------|
| Determination of the Erm <sup>R</sup> marker insertion |                         |                          |
| <i>Himar</i>                                           | CAAACATGAGAGCTTAGTACGTG | AACACACTCTTAAGTTTGCTTC   |
| <i>RecA</i> inactivation                               |                         |                          |
| <i>RecA</i>                                            | GAATTCGGTGATGAACGTCGAA  | GGATCCCATACGAGCTTGCAAAC  |
| <i>gbs1121</i> inactivations                           |                         |                          |
| <i>gbs1121</i>                                         | GGATCCATGGCAATCTAGCAGAT | GAATTCCTGCATGCTTGCCGA    |
| Characterization of transconjugants*                   |                         |                          |
| 0183                                                   | TTGGCTTATGTCAAAGGTT     | TATGACCAGAGGTCCCTAGA     |
| 0235                                                   | CGTACCCTAGTGAGTTGTC     | CAGAAACAAGTCGGTCTTTC     |
| 0262                                                   | ATAAAAGGCGTGCAATTAGA    | AACACCAAATTAGCCAAATAA    |
| 0286                                                   | GATTCAACTTTAGCAGGACG    | TTACTCCAAGGGCTATTTCA     |
| 0318                                                   | CAGAAATGGACAGAACCATT    | ACCAAACCACCATAAGAATG     |
| 0355                                                   | TATTGAAGAAACAAAGCCGT    | ATCATAGCGCATACGAGAAT     |
| 0358                                                   | AATAGCGTTACTGCGGATAC    | TTCGTTGATTTACCTTCTAA     |
| 0411                                                   | GCTCAAGAATGGTTAGATGG    | TTTGCTCCAGACTTTTCAT      |
| 0423                                                   | TTAGGTTTTGTAAACGGCATT   | TCATTTCTTACGTGGTCTGA     |
| 0442                                                   | CCTGGTACTCATGAACGACT    | CTTCAATAAACCATCCCCATA    |
| 0449                                                   | GACATGTGGTGTCCTTGA      | AAAGTCTCTATAGCAAACCTCCAT |
| 0502                                                   | CTTCTCAAATGAGTCCGTC     | GAAACAACCTTCAAACCTGC     |
| 0514                                                   | TATGGCGTCACAAGACAATA    | TGAGTCAGAGACATATTGCG     |
| 0535                                                   | GGAAAAACAAAAGCAAGTTGA   | TCACAACATCCAAAGGAATA     |
| 0542                                                   | TGGGTTTTGAATTAGAGGAA    | TAGAAATAACGGGAAGACGA     |
| 0654                                                   | TGAACGCATCTGTTCTATTG    | TACCAAAGCTGAGCAGTACA     |
| 0674                                                   | GAAATTACAGGTCCAGCATC    | CTAGCCCTACAACCATTTTG     |
| 0684                                                   | CTTTAGGAGTTCTGCGTCAC    | TTTACCTAATTTGCGATGGT     |
| 0743                                                   | TCTTTAATCGATGCTGGTT     | TTGCTTAAGTGTCCAAGGAT     |
| 0747                                                   | GCACTTGAGTCGAGAACAAT    | TTTCTGTTGCGATAGCTTTT     |
| 0788                                                   | TAAAAGGAGCAAGAGATGGA    | ATGCCATCTGAACATCATAAC    |
| 0807                                                   | TCAAAATGCGGAATTAGACT    | CTAAATCACGCGCTAAATCT     |
| 0832                                                   | AAAGGCACTCAGTCGTAGAG    | TATTTATTGACTGGACGCAA     |
| 0864                                                   | AACCAGGAGTTGATATGTGG    | CATAGTTAGCACCATAGGC      |
| 0890                                                   | GAAAAAGAGCGTGCAGTATT    | AGCATAAGCTCCGATGATAA     |
| 0900                                                   | GGACAAGACTACGAACAAGC    | TACCGTATTTGTTACGGAGG     |
| 0927                                                   | GCAGATAAGGGAGATATCGTT   | AAAGAGAGCATCAATCGAAC     |
| 0930                                                   | GTCTAACTGAGCACGGTTTC    | CTCCCATACGAGATGCTAAG     |
| 0948                                                   | CAAAATGGACTTCGTGCTAT    | AGAACGACCAGTTTGAGAAA     |
| 0968                                                   | TCGGTGATATCATTAAATTCAAA | AGTTGGGCTAACTTTTGATG     |
| 1044                                                   | ACTGACGCAAATGAATTTTT    | AAAGGCCAATTAATGACAAA     |
| 1076                                                   | ATCGCCCTTGATTTAGTACA    | TCTATTCAAAGACCAGGTGA     |
| 1082                                                   | TGTCAAAATAGGAATGGAGC    | TTTCGTTATAGGTCCTCCCA     |
| 1091                                                   | GAAGCTTTCCGGATTTTTAT    | AGCATGAAAGTCAGCATCTT     |
| 1105                                                   | CAGAATAACCTTCCAAGTGC    | CTTGGTAGACATTGTTGGGT     |
| 1108                                                   | TTAATCAAGCATTACGGACA    | ATAAAAGTCACTTCCGCATC     |
| 1163                                                   | CAAGCTTATTTTCTCATGTTCA  | CACCTACTTTTGGCGTATT      |
| 1167                                                   | TCGAAAAAGCTAGTTCCAAA    | TGGAGAAAAACTCAAGATGC     |
| 1180                                                   | TGACAACCGTTTACTTGAGTT   | TAGTTGAGGTGCTATTTTCGAG   |
| 1198                                                   | GGAAAAACAGCTACAAGTTGG   | GCTTCGTAGTCAACATCTGA     |
| 1231                                                   | GAATCGTTTATCTCCAAGA     | CTACCAAAGAAGCCACGATA     |
| 1379                                                   | TGAAGAATATCAGTTTCCCG    | CCATTTGCCAAGGACTAATA     |
| 1410                                                   | TTTTGGACACCGTACTTTCT    | TGTAAACTAGCAGCATCACG     |
| 1445                                                   | ATGGAGCAAAAGTCCTGTTA    | TTTCTAAATGCAAGATGGGT     |
| 1494                                                   | CACCTTTTAGACGAACGAAC    | AACTCAGCCAAAGTACGTGT     |
| 1581                                                   | TCAGACACAATTTGGTGGTA    | TTGTATCAATTTGCACGATGT    |
| 1606                                                   | GGGTTATCATCACACGATT     | GACCTCAAATGGATTAGCTG     |
| 1627                                                   | GCTATTGGGGTTAGTGACAG    | ATCCTTGTGACGATATCCTT     |
| SNP mapping in a collection of 14 additional strains   |                         |                          |
| 0588                                                   | CTTCGCTGAATGTTTAGGTT    | ATTGCATGTAAATAGCGGTT     |
| 0589                                                   | TGATGGAAAAGGCTCTCTTA    | TTTCACACGTCTATCAACCA     |
| 0594                                                   | GCTTGCCTTAAACAAATTGA    | AATGAAGAGGCCATTACAAC     |
| 0595                                                   | TTCTTTCCTTACTTGCAGGA    | TCTAAAATGATATCCGCAGAA    |
| 0596                                                   | ACCAAGATGCAACATTTCTT    | TTGTTGAATCCTTCAGCTTC     |
| 0597                                                   | TCAGGCTAAAGATGGAAGG     | CATAAGGGATCTCTTCGCTA     |
| 0598                                                   | CATATTTGGAGACGAGGAAA    | TTTGCTGTTTTAGTTGTCCA     |
| 0601                                                   | GATGTTTCAGCAGGTGTCTT    | AAAATTGGCAAGATTATCCA     |



| Name | Forward Probe          | Reverse Probe         |
|------|------------------------|-----------------------|
| 0602 | TTATATTTGGGATTTGGGTG   | TGACCCATCGACTAATAAGG  |
| 0605 | AGGTTTGTAGTCATGGACG    | CACAAAAAGCAATTCCTACC  |
| 0608 | AGCTTCTACTGGTGAACACG   | TAGCCCATCTTCAGTACCTT  |
| 0610 | AGTTACCCGAATTGTTGATG   | CCGAATCATGTCTCAGTAT   |
| 0612 | CCACAGAGAAGGACAGAAAAG  | ATGGTATCTGTTCTCGCATC  |
| 0615 | TTTGGTTTTAGGGATTACGA   | TTTTTAGGTTTATCGCCTGT  |
| 0628 | GCGACTGGAATGAGTATTGT   | GTAATTCCAACACAAAACGGT |
| 0630 | TCGTTTAATTTTCTTAGCGG   | CAATGTAAAAACGGTACCTT  |
| 0636 | TTCTTATCTTTTAGTGCCG    | GTCTGTTTTCTGAATTTTG   |
| 0641 | GGATTATTGGAGTCGTTTTTG  | TCTCCGACTTTCCAATTTAAA |
| 0642 | TACCTTTTCATGGAGATTGG   | TGGATAGTGATATGCGACTG  |
| 0645 | GAGGACAGGGTAATGTTTTCAG | AGAAAAGAACGGTTGACTTGA |
| 0646 | GCAAGAGCTTTACAAGAGGA   | TAAAAAGCTTACGAGCCAAG  |
| 0653 | AGAGGTTCTCTGAGCAATACA  | TGACAAGAACAACAAAACCA  |
| 1019 | GCGCTATGGTGTTTATCTT    | CTATAATCGGTTTTTGCC    |
| 1020 | CTCCAAGTGTTGAAAGAGC    | CTACGCAAAGTTGAAGGTT   |
| 1022 | AAGCTATCGGACAAATCAAAA  | TTTTTGCCATAATCTCCAAT  |
| 1024 | GAAAATTCAGCTCTCACCAC   | GAATTTCTGGTTAACTGCG   |
| 1029 | GGAAAAGTCTCGATTTGATG   | GACTTTTGCCATGCTAATTC  |
| 1032 | CAAGCTAAAGAAGATTGCGT   | CATGTACTACCATGCCACAG  |
| 1035 | TAATATTAGGGGAGCAAGCA   | TCGATAGATAAAGTCCCCCT  |
| 1036 | CCAACAAGTAACCCAGAGAA   | TCTAAAAAGCGGGATACTTG  |
| 1038 | CCGGTGATTTTATCCATTTA   | CAACATCATTTGACGGTGTA  |
| 1040 | ATGGCAACTACGACAAAAAC   | CAACAATGCGATCTAAAAACA |
| 1416 | TCTGCATCAGGTGTTGATTA   | CATCAAAACGATCCATCTCT  |
| 1417 | ACCGTATGACTAGCGATGAT   | TATCAGGCAGACCTTCTAGC  |
| 1418 | TTATCACGACTTGAGCAAAA   | TCAACCGTTATCTGCCTAAT  |
| 1419 | TTGATTCAGGACCAGTTCAT   | ATGCTTCAGCTTTTATTTGC  |
| 1421 | CTTCCTATCATGAAGCCAAC   | TACCATATTTACGCCGCTCT  |

\*According to NEM316 nomenclature.
